1 Novel approach to quantitative spatial gene expression uncovers genetic stochasticity in the developing

2 *Drosophila* eye

3

4 Sammi Ali<sup>1¶</sup>, Sarah A. Signor<sup>1¶\*</sup>, Konstantin Kozlov<sup>2</sup>, Sergey V. Nuzhdin<sup>1,2</sup>

5

6 <sup>1</sup>Molecular and Computational Biology, University of Southern California, Los Angeles, California, 90089 USA

7

8 <sup>2</sup>Department of Applied Mathematics, St. Petersburg State Polytechnic University, St. Petersburg, 195251,

9 Russia

10 <sup>¶</sup>Co-first author

11 <sup>\*</sup>Corresponding author

12 Email: [ssignor@usc.edu](mailto:ssignor@usc.edu)

13

14

15

16

17

18

19

20

21

22

23

24

25

26

## 27 **Abstract**

28 Robustness in development allows for the accumulation of neutral genetically based variation in expression,  
29 and here will be termed ‘genetic stochasticity’. This largely neutral variation is potentially important for  
30 both evolution and complex disease phenotypes. However, it has generally only been investigated as  
31 variation exhibited in the response to large genetic perturbations. In addition, work on variation in gene  
32 expression has similarly generally been limited to being spatial, or quantitative, but because of technical  
33 restrictions not both. Here we bridge these gaps by investigating replicated quantitative spatial gene  
34 expression using rigorous statistical models, in different genotypes, sexes, and species (*Drosophila*  
35 *melanogaster* and *D. simulans*). Using this type of quantitative approach with developmental data allows for  
36 effective comparison among conditions, including health versus disease. We apply this approach to the  
37 morphogenetic furrow, a wave of differentiation that sweeps across the developing eye disc. Within the  
38 morphogenetic furrow, we focus on four conserved morphogens, *hairy*, *atonal*, *hedgehog*, and *Delta*.  
39 Hybridization chain reaction quantitatively measures spatial gene expression, co-staining for all four genes  
40 simultaneously and with minimal effort. We find considerable variation in the spatial expression pattern of  
41 these genes in the eye between species, genotypes, and sexes. We also find that there has been evolution of  
42 the regulatory relationship between these genes. Lastly, we show that the spatial interrelationships of these  
43 genes evolved between species in the morphogenetic furrow. This is essentially the first ‘population  
44 genetics of development’ as we are able to evaluate wild type differences in spatial and quantitative gene  
45 expression at the level of genotype, species and sex.

46

47

## 48 **Introduction**

49 Natural genetic variation within populations has long been the purview of evolutionary and population  
50 geneticists, while developmental biologists focus on the effect of large mutations in otherwise isogenic  
51 backgrounds (Paaby and Gibson, 2016). This dearth of work on developmental variation in wildtype genetic  
52 backgrounds is in part because developmental approaches have long been restricted to data that is semi-  
53 quantitative (i.e. *in situ* hybridization, antibody staining). Indeed, gene expression studies are generally spatial or  
54 quantitative, but not both. In addition, the data is generally not interrogated from a quantitative perspective,  
55 including replication and rigorous statistical models. Without quantitative replication and statistical tests one  
56 cannot effectively compare developmental processes among conditions, including health versus disease. This is  
57 especially important given the potential for complex interactions between conditionally neutral differences in  
58 gene expression to result in disease phenotypes. Here we use hybridization chain reaction (HCR) to bridge this  
59 gap between developmental and quantitative or population genetics by quantitatively measuring spatial gene  
60 expression in multiple genotypes from two sexes of two species (*Drosophila melanogaster* and *D. simulans*)  
61 (Choi et al., 2014). Furthermore, we introduce rigorous replication allowing for statistical hypothesis testing.  
62 This is essentially the first ‘population genetics of development’ as we are able to evaluate wild type differences  
63 in spatial and quantitative gene expression at the level of genotype, species and sex. Multiplexing of four genes  
64 simultaneously also allows more rigorous analysis of gene co-expression, compared to other techniques that  
65 require inference across samples that have been individually stained. We use this enormous developmental  
66 dataset to focus on the well-known morphogens driving ommatidia specification in *Drosophila* (Atkins et al.,  
67 2013; W. Li et al., 1995; Raj et al., 2008; Shah et al., 2016; Tsachaki and Sprecher, 2011).

68 The *Drosophila* eye is formed from an imaginal disc, which is initially patterned by a wave of  
69 differentiation marked by a visible indentation of the tissue, termed the morphogenetic furrow (MF). The MF  
70 passes from the posterior to the anterior of the disc over a period of two days (90 minutes per adjacent row),  
71 giving each disc an element of both time and space in development (Fig 1) (Roignant and Treisman, 2009). A  
72 strength of the eye disc as a model is that within the MF all cells are arrested at G1, and there will be no  
73 additional variability introduced due to differences between cells in their stage of cell division (Baker and Yu,

74 2001; Escudero and M. Freeman, 2007; Firth and Baker, 2005; Firth et al., 2010). Furthermore, while there is  
75 evidence that transcription is bursty, the eye disc is composed of a repeated pattern of cells that will become  
76 ommatidia, akin to natural replication (Bothma et al., 2014; Fukaya et al., 2016; Tantale et al., 2016). By  
77 averaging across it, we reduce the impact of differences in transcriptional bursting across the eye disc.

78 The furrow is initiated by *hedgehog*, which both represses (short range) and activates (long range) *hairy*  
79 (Fig 1) (Felsenfeld and Kennison, 1995; Strutt and Mlodzik, 1997). *hairy* represses *atonal*, preventing  
80 precocious neural development anterior to the MF (though this role has been recently contested) (Bhattacharya  
81 and Baker, 2012; N. L. Brown et al., 1991; 1995). *hedgehog* activates the expression of *atonal*, driving the MF  
82 anteriorly (Fig 1) (Heberlein et al., 1993; Ma et al., 1993; Greenwood and Struhl, 1999). *atonal* is the proneural  
83 gene in *Drosophila*, establishing the competency to become photoreceptor cells (Jarman et al., 1994). The  
84 relationship between *Delta/Notch* and the other members of the pathway is more complex, but it is clear that in  
85 cells posterior to the furrow *Delta/Notch* repress *atonal* (Fig 1) (Firth and Baker, 2005; Gavish et al., 2016).  
86 There is also some evidence that *Delta/Notch* repress negative regulators of *atonal* at the furrow, such as *hairy*  
87 (Bhattacharya and Baker, 2009; N. L. Brown et al., 1995; A. B. A. M. Freeman, 2001). In addition, there is some  
88 evidence suggesting that *Notch/Delta* are involved in the early stages of *atonal* induction, and alternatively that  
89 *atonal* activates its own transcription (Baker and Yu, 1997; Dominguez and Hafen, 1997; Dominguez et al.,  
90 1998; Y. Li and Baker, 2001; Spencer et al., 1998; Sun et al., 1998). There are many other genes involved in the  
91 specification of the eye disc that will not be mentioned here, in favor of focusing on the genes we have assayed.  
92 We analyze the spatial quantitative expression of *hedgehog*, *hairy*, *atonal*, and *Delta* to understand the evolving  
93 regulatory logic of the gene network and changes in spatial dynamics between sexes and species.

94 We term differences in gene expression between species, genotypes, and sexes ‘genetic stochasticity’, as  
95 there are no phenotypic differences between these *Drosophila* eyes other than size and proportion of  
96 photoreceptor subtype. Size is included as a co-factor in the relevant models discussed below, and results only in  
97 a larger area being patterned for ommatidia rather than a difference in pattern. In addition, photoreceptor subtype  
98 is not determined or affected by the genes expressed during the initial patterning phase in the MF (Cook et al.,  
99 2003; Johnston and Desplan, 2014; Johnston et al., 2011; Wernet et al., 2006). We interpret genetic stochasticity  
100 in quantitative spatial patterns of gene expression in light of regulatory relationships among them. We approach

101 a spatial and quantitative analysis of these gene expression patterns in three ways, first by explicitly creating a  
102 spatial gene expression profile and comparing between genotypes, sexes, and species. Second, we were  
103 interested in examining if the regulatory relationship between these genes had evolved between species or  
104 harbors variation within a species. Lastly, we investigated the possibility that the spatial relationship between  
105 these genes relative to the MF had evolved or harbors variation within populations.

106

## 107 **Methods**

### 108 **Fly stocks**

109 *D. simulans* were collected from the Zuma organic orchard in Zuma beach, CA in the spring of 2012 (Signor et  
110 al., 2017). They were inbred by 15 generations of full sib crosses. *D. melanogaster* were collected in Raleigh,  
111 North Carolina and inbred for 20 generations (Mackay et al., 2012).

### 112 **Staging and dissection of larvae**

113 All flies were reared on a standard medium at 25° C with a 12-h light/12-h dark cycle. 120 hours after hatching,  
114 3<sup>rd</sup> instar larva were placed in phosphate buffered saline (PBS) and separated by sex. Their guts were carefully  
115 removed posteriorly and their body was inverted anteriorly to expose the brains, eye discs and mouth hooks.  
116 After fixation and labeling (described below), eye discs were isolated and mounted. The authors note that while  
117 there will be variation in the exact row of the eye that is being patterned between images, replicates were not  
118 conducted at the same time nor from the same cross. As such, with up to five replicates per line, any variation in  
119 the exact positioning of the furrow will serve to increase noise within the dataset rather than create false signal.

### 120 **Hybridization Chain Reaction (HCR)**

121 HCR is unique in that it produces gene expression patterns that are both quantitative and spatial. The DNA  
122 probes were designed and synthesized by Molecular Instruments (Choi et al., 2014) (S1 Table). Four genes were  
123 multiplexed in each preparation as orthogonally-designed hairpins allowed the simultaneous amplification of  
124 their target sequences (Fig 1, S1 Fig). Each target mRNA was detected using five DNA probes to annotate the  
125 position and expression levels for each of the four assayed genes (*hairy*, *atonal*, *Delta* and *hedgehog*). Each  
126 probe contained two-initiator sequences (I1 and I2) that bound to a specific amplifier.

127 While other approaches such as FISH can be adapted to detect individual transcripts, HCR has a linear signal  
128 that is 20x brighter than FISH, it reduces non-specific background staining, and it can detect 88% of single RNA  
129 molecules in a cell with an appropriately low false discovery rate (Ma and Moses, 1995; Pan and Rubin, 1995).  
130 It is also highly repeatable, with different sets of probes targeted to the same gene showing correlations  
131 of .93-.99 (S. Fraser, pers. comm.).

132 The protocol for HCR was modified from (Choi et al., 2014) and is described briefly. The full protocol  
133 is available in S1 File. Inverted 3<sup>rd</sup> instar larva were fixed in 4% paraformaldehyde diluted with PBS  
134 containing .2% Tween 20 (PBST). After fixation, larva were washed with PBST, then increasing concentrations  
135 of methanol (30%, 70% and 100%) at 25° C. Larva were stored in 100% methanol at -20° C. Methanol-fixed  
136 samples were thawed, washed with ethanol, re-permeabilized in 60% xylene, washed with ethanol, then  
137 methanol and rehydrated with PBST. Samples were permeabilized with proteinase K (4 mg/mL), fixed in 4%  
138 formaldehyde then washed with PBST at 25° C. Finally, at 45° C, samples were pre-hybridized for 2 hours  
139 before the addition of all the probes. The probe-hybridized larva were placed in wash buffer (Molecular  
140 Instruments) at 45° C to remove excess probes. Fluorescently labeled hairpins were snap-cooled then added to  
141 the samples at 25° C and placed in the dark to amplify the signal. Afterwards, samples were washed in 5X SSCT  
142 solution, isolated in PBST, then placed in Prolong Gold anti-fade mounting medium (Molecular Probes).

### 143 **Microscopy**

144 Three dimensional images of mounted, HCR stained 3<sup>rd</sup> instar larva eye discs were acquired on a Zeiss LSM 780  
145 laser scanning microscope (Carl Zeiss MicroImaging, Inc., Thornwood, NY, USA) with Objective Plan-  
146 Apochromat 63x/1.40 Oil. The gain was adjusted to avoid pixel saturation.

### 147 **Extraction of gene expression profiles**

148 The first steps in the image analysis is bringing each image to the same orientation and segmenting it. Image  
149 segmentation produces a mask in which pixels are assigned to objects or background. Here the objects are one  
150 or several mRNA molecules. Then the cellular structure of the imaginal disc is approximated using a hexagonal  
151 array. Though the real underlying cell structure of the imaginal disc is technically able to be recognized, this was  
152 unsatisfactory in our data due to imaging noise. Thus, at the second step using the R package hexbin we  
153 constructed a partition of the imaginal disc area into elements that represent pseudo-cells and have a

154 biologically-relevant hexagonal shape (Brennan et al., 1998). The number of pseudo-cells was selected by visual  
155 inspection of the combined image in which the hexagonal structure was overlaid onto the *atonal* channel to  
156 verify fit. We are primarily interested in expression profiles around the MF, providing us a convenient landmark  
157 to align images from different preparations, thereby assigning coordinates to the pseudo-cells. However,  
158 deformations of the eye disc during growth and preparation sometimes distorts the MF. We used splines to  
159 correct for any bending or deformation of the MF. Next, using the histograms of cumulative pixel intensities of  
160 objects in expression domains and non-expressing areas we estimated the typical intensity of a transcript and  
161 typical background signal, respectively. Consequently, the cumulative intensities greater than the background  
162 are divided by the intensity attributed to single mRNA molecule to yield counts of mRNA molecules. This  
163 normalizes the expression profiles and corrects for differences in microscope gain between images. Finally, the  
164 gene expression profiles are estimated for every pseudo-cell.

### 165 **Morphological reconstruction and contrast mapping segmentation**

166 To detect gene transcripts within the image stacks we applied a version of the MrComas method that was  
167 modified for processing 3D images (Kozlov et al., 2017). This approach first enhances contrast within the image  
168 and reduces noise. The images were enlarged by a factor of four with the nearest-neighbor algorithm. They were  
169 processed by morphological reconstruction using both opening and closing, where closing (opening) is dilation  
170 (erosion) that removes extraneous dark (bright) spots and connects bright (dark) objects (Vincent, 1993). The  
171 contrast mapping operator assigns each pixel the maximum value between the pixel-by-pixel difference of the  
172 reconstructed images and their pixel-by-pixel product and produces the rough mask for each channel. An image,  
173  $I$ , is mapping from a finite rectangular subset  $L$  onto the discrete plane  $Z^2$  into a discrete set  $0, 1, \dots, N - 1$  of  
174 gray levels. Let the dilation  $\delta_B$  and erosion  $\epsilon_B$  by structural element  $B$  be defined as:

$$175 \quad \delta_B(I) = \bigvee_{\gamma \in B} I(\gamma) = I \oplus B \quad \epsilon_B(I) = \bigwedge_{\gamma \in B} I(\gamma) = I \ominus B \quad (1)$$

176 Where  $\bigvee$  and  $\bigwedge$  denote infimum and supremum respectively. Then formulae:

$$177 \quad \delta_{I,B}^1(J) = (J \oplus B) \wedge I \quad \epsilon_{I,B}^1 = (J \ominus B) \vee I \quad (2)$$

178 denote geodesic dilation  $\delta_{I,B}^1$  and erosion  $\epsilon_{I,B}^1$ . Binary reconstruction  $\delta$  extracts those connected components of the  
179 mask image which are marked on the marker image, and in grayscale it extracts the peaks of the masked image

180 marked by the marker image. Using the dilated masks image  $I$  as the marker  $J: J = \delta_B(I)$  defines closing by  
181 reconstruction:

$$182 \quad \gamma_B(I) = \epsilon_{I,B}^1 \epsilon_{I,B}^1 \dots \epsilon_{I,B}^1 [\delta_B(I)] \quad (3)$$

183 Opening by reconstructions uses eroded mask  $I$  as a marker  $J$ :

$$184 \quad \phi_B(I) = \delta_{I,B}^1 \delta_{I,B}^1 \dots \delta_{I,B}^1 [\epsilon_B(I)] \quad (4)$$

185 Then the difference between closing and opening by reconstruction has the meaning of the gradient:

$$186 \quad \nabla_B(I) = \gamma_B(I) - \phi_B(I) \quad (5)$$

187 To create strong discontinuities at object edges and flatten signal with the objects the contrast mapping operator  
188 takes a maximum between the difference and the pixel-by-pixel produce of the reconstructed images and  
189 produces a rough mask for each channel:

$$190 \quad R = \max \{ \nabla_B(I), \gamma_B(I) \odot \phi_B(I) \} \quad (6)$$

191 Subsequently, this mask was subjected to distance transform, which substituted each pixel value with the  
192 number of pixels between it and the closest background pixel. This operation creates ‘peaks’ and ‘valleys’ of  
193 intensity inside foreground objects. To split erroneously merged objects watershed transform was applied, which  
194 treats the whole image as a surface and intensity of each pixel as its height and determines the watershed lines  
195 along the tops of ridges separating the catchment basins (Meyer, 1994). The quality of segmentation is assessed  
196 visually by inspection of the object borders overlaid with the original image. Finally, each mask is returned to  
197 its original size and quantitative measures are made of shape and intensity characteristics such as the number of  
198 pixels, as well as their mean and standard deviation in the detected object. MrComas is free and open source  
199 software available at <http://sourceforge.net/p/prostack/wiki/mrcomas>.

## 200 **Approximating the MF**

201 We defined the position of the MF as the middle of overlap between *hairy* and *atonal* expression. The shape of  
202 the MF was approximated with a spline using function `smooth.spline` in R. The degrees of freedom and other  
203 parameters were chosen to make the approximation coincide visually with a MF image.

## 204 **Inferring counts of transcript number**



205 Segmentation of the image provided a table of coordinates and the shape and intensity characteristics of detected  
206 transcripts. Here, we applied filtering steps to remove false positives and determine the count of mRNA  
207 transcripts. First, we assumed the object we detected as least intense but most frequent corresponds to a single  
208 mRNA molecule. Then, we inferred background intensity for objects outside of well-annotated domains of  
209 expression of the four genes. Assuming that the majority of true objects contain a single molecule, we compare  
210 the distribution of cumulative intensities of particles in expression domains and areas of known non-expression  
211 to obtain the typical intensity of a true single molecule and a false positive, respectively. All detected signals that  
212 were lower than the typical intensity of a false positive were removed from the dataset. The number of removed  
213 objects is typically less than 10%. All other cumulative pixel intensities were divided by the typical intensity of a  
214 true single molecule as normalization coefficient to yield an estimate of the number of mRNA transcripts.

### 215 **Image registration**

216 We applied an affine coordinate transformation to each eye disc to make the corresponding maxima and the width  
217 of expression patterns of four genes in different eyes coincide as closely as possible. To do so, we shifted the  
218 coordinate system of each eye to its center and also scaled them in the A-P direction. The center of the pattern in  
219 A-P direction is the MF.

220 We mapped the expression patterns to a unified hexagonal structure in order to make comparisons between  
221 pseudo-cells from individual imaginal discs. The unified cell structure was constructed using the R package  
222 hexbin. Each cell in the unified grid represents an 'average' cell from individual eyes. The size of a hexagon in the  
223 unified grid is greater or equal than the cell size in the individual eye. Thus, the number of molecules in each  
224 unified cell in the mapped pattern equals the mean over the cells from native pattern that are covered by this unified  
225 cell. After such coordinate transformation, the MF region is defined as 20 cells on either side of the MF, to focus  
226 the analysis on the area of interest (the MF).

### 227 **Filtering and quality controls for each eye disc**

228 Some eye imaginal discs were damaged or deformed in the process of dissection or mounting, resulting in regions  
229 of erroneous gene expression, such as disruptions to the MF. The expression profile of each disc was examined by  
230 eye and these regions were individually trimmed out of the final dataset. At the edges of each eye disc the pattern  
231 of the MF was also degraded, so each eye disc was trimmed dorso-ventrally prior to analysis. Outliers were

232 excluded from the dataset, determined as a single member of the five replicates with more than a 3x difference in  
233 expression values. This resulted in a final dataset of 55 eye discs.

### 234 **Analysis of individual spatial gene expression patterns**

235 We were primarily interested in variation in gene expression profiles across the eye disc, that is using differences  
236 in expression averaged across rows along the  $x$ -axis. While the  $y$ -axis is of interest, variation in the shape, size,  
237 degree of deformation, and occasional damage to the disc made this analysis intractable. We fit curves to each  
238 gene expression profile using the `mgcv` package in R, using a generalized additive model with integrated  
239 smoothness estimation. Smoothing terms are represented using penalized regression splines. `predict.gam` was  
240 used to fit the curves to the original range of values and down sample the curves to eight points. MANOVAs  
241 were performed using the “Pillai” test for species  $\times$  genotype  $\times$  sex.

### 242 **Modeling framework to understand variation and evolution of the eye patterning gene network**

243 We wanted to understand if cryptic variation existed within the regulatory logic of *hairy*, *atonal*, *Delta*, and  
244 *hedgehog*, or if there had been cryptic evolution between species. To understand the regulatory logic between  
245 genes we focused on biologically relevant relationships, such as the regulation of *hairy* by *Delta* and *hedgehog*,  
246 but excluded such relationships as *hairy* and *atonal*. This was due to the low overlap between *hairy* and *atonal*  
247 expression domains, where including cells where only one or another was expressed would artificially create a  
248 relationship between expression levels. Both *hairy* and *atonal* are downstream, directly or indirectly, of *Delta*  
249 and *hedgehog* thus it was these relationships that were modeled. We limited the analysis to cells where all genes  
250 included were expressed in at least ten molecules.

251 In the previous analysis, we investigated variation in the cryptic spatial quantitative expression pattern of  
252 genes in the MF. Here, we will investigate the possibility that genes in the MF have evolved, or harbor variation,  
253 for how they affect each other in particular cells. For example, is high *atonal* expression associated with high  
254 expression of *hedgehog*, given that *hedgehog* activates *atonal*? We used the following equations to determine the  
255 relationship between the expression of these genes:

256

$$257 \text{ hairy}(i, s) = k^{Dl} \times Dl(i, s) + k^{hh} \times hh(i, s) + \alpha \quad (7)$$

258

259 
$$atonal(i, s) = k^{Dl} \times Dl(i, s) + k^{hh} \times hh(i, s) + \alpha \quad (8)$$

260

261 The coefficient  $k$  and constant  $\alpha$  were fit using standard methods for multiple regression. Here  $hairy(i, s)$   
262 and  $atonal(i, s)$  are the measured expression level of each gene in cell  $i$  in individual  $s$ .  $Dl(i, s)$  and  $hh(i, s)$  are  
263 vectors containing the corresponding expression levels of  $hairy$  and  $atonal$ 's regulators  $Delta$  and  $hedgehog$ . To  
264 determine if the regulatory logic is the same between genotypes and species we can then use the regression  
265 coefficients from these models in a MANOVA. We note that we cannot exclude the possibility that other  
266 unmeasured genes are responsible for producing this variation.

## 267 **Model for understanding overall variation and evolution of MF structure**

268 Lastly, we wanted to understand if there is variation in the relationship between the MF and gene expression, or  
269 if variation existed for the size of the MF overall. For example, the MF was called as the position of overlap  
270 between  $atonal$  and  $hairy$  expression, but it is unclear how the overall gene expression pattern of these genes  
271 relates to their overlap. For example, is the position of maximum expression of each always the same relative to  
272 the MF? Two processes occurred to make the MF comparable between samples, they were shifted to occupy the  
273 same position depending upon the position of overlap of  $hairy$  and  $atonal$ , and they were scaled to occupy the  
274 same total area. The amount required to scale will depend both on the size of the original disc and the width of  
275 the MF relative to the disc. To account for differences in size we include the number of rows in the original disc  
276 prior to any transformations as a cofactor and perform ANOVA in R.

277

## 278 **Results**

### 279 **Individual spatial gene expression patterns**

280 First, to characterize the spatiotemporal dynamics of transcriptional activity along the anterior-posterior axis, we  
281 took the spatial average of signal across the dorsal-ventral axis and compared between genotypes, sexes, and  
282 species (Fig 2A). The authors note that smoothed curves in the figures were created using `smooth.spline` in  
283 `ggplot2`, which is not the same method for curve fitting as in the analysis. As such they are meaningful

284 reflections of the patterns in the data but not depictions of actual analyses. We found abundant spatial  
 285 quantitative variation in expression profiles (Fig 2-3). The expression profile of *hairy* around the MF harbors  
 286 variation between genotypes and there is an interaction between genotype and sex (Table 1,  $p = 2 \times 10^{-3}$ ,  $p =$   
 287 0.02). There has also been evolution between species for *hairy* (Table 1,  $p = 3 \times 10^{-4}$ ). While *atonal* has not  
 288 evolved between species, there is variation in expression profile between genotypes, sexes, and there is an  
 289 interaction between genotype and sex (Fig 3A-C, Table 1,  $p = 4 \times 10^{-4}$ ,  $p = .02$ ,  $p = .02$ ). Surprisingly, given the  
 290 conservation of *Delta* in general, *Delta* harbors variation in spatial quantitative expression behind the MF  
 291 between genotypes and sexes (Table 1,  $p = 2 \times 10^{-3}$ ,  $p = 7 \times 10^{-4}$ ) and there are significant interactions between  
 292 genotype and sex (Fig 2B-C, Table 1,  $p = 2 \times 10^{-3}$ ). There has also been evolution of *Delta* between species, and  
 293 evolution of the interaction between species and sex (Table 1,  $p = .03$ ,  $p = 3 \times 10^{-4}$ ). *hedgehog* is not different  
 294 between species but is significantly different between genotypes, sexes, and there is an interaction between the  
 295 two (Table 1,  $p = 5 \times 10^{-4}$ ,  $p = .05$ ,  $p = 1 \times 10^{-3}$ ). There is also a significant interaction between species and sex  
 296 (Table 1,  $p = .01$ ).

**Table 1: The results of the full model for each gene.**

*hairy*

| Effect         | numDF | denDF | F-value | p-value                              |
|----------------|-------|-------|---------|--------------------------------------|
| Species        | 8     | 35    | 5.1     | <b><math>3 \times 10^{-4}</math></b> |
| Genotype       | 32    | 152   | 2.07    | <b><math>2 \times 10^{-3}</math></b> |
| Sex            | 8     | 35    | 1.08    | 0.32                                 |
| Species x Sex  | 8     | 35    | 1.94    | 0.08                                 |
| Genotype x Sex | 32    | 152   | 1.73    | <b>0.02</b>                          |

*atonal*

| Effect         | numDF | denDF | F-value | p-value                              |
|----------------|-------|-------|---------|--------------------------------------|
| Species        | 8     | 35    | 1.53    | 0.18                                 |
| Genotype       | 32    | 152   | 2.31    | <b><math>4 \times 10^{-4}</math></b> |
| Sex            | 8     | 35    | 2.6     | 0.02                                 |
| Species x Sex  | 8     | 35    | 1.91    | 0.09                                 |
| Genotype x Sex | 32    | 152   | 1.73    | <b>0.02</b>                          |

*Delta*

| Effect         | numDF | denDF | F-value | p-value                              |
|----------------|-------|-------|---------|--------------------------------------|
| Species        | 8     | 35    | 2.43    | <b>0.03</b>                          |
| Genotype       | 32    | 152   | 2.07    | <b><math>2 \times 10^{-3}</math></b> |
| Sex            | 8     | 35    | 4.55    | <b><math>7 \times 10^{-4}</math></b> |
| Species x Sex  | 8     | 35    | 5.03    | <b><math>3 \times 10^{-4}</math></b> |
| Genotype x Sex | 32    | 152   | 2.03    | <b><math>2 \times 10^{-3}</math></b> |

*hedgehog*

| Effect         | numDF | denDF | F-value | p-value                              |
|----------------|-------|-------|---------|--------------------------------------|
| Species        | 8     | 35    | 0.87    | 0.55                                 |
| Genotype       | 32    | 152   | 2.28    | <b><math>5 \times 10^{-4}</math></b> |
| Sex            | 8     | 35    | 2.23    | 0.05                                 |
| Species x Sex  | 8     | 35    | 2.88    | 0.01                                 |
| Genotype x Sex | 32    | 152   | 2.17    | <b><math>1 \times 10^{-3}</math></b> |

297 Significant *p*-values are indicated in bold, with gray shading.

298 Thus, *hairy* and *Delta* have evolved different spatial quantitative expression patterns between species, while  
 299 *hairy*, *atonal*, *Delta*, and *hedgehog* harbor cryptic variation within species and sexes. Given that there are  
 300 regulatory relationships between these genes, it is interesting to see that they do not all harbor variation for the  
 301 same factors. This could potentially be due to the influence of other unmeasured regulatory factors, or to

302 variation in the relationship between these genes and other components in the gene regulatory network.  
303 However, whatever the source of ‘buffering’ of the network, be it the effect of other genes or threshold effects  
304 on development, the fact that this information is not retained within the steps of the pathway supports our  
305 supposition that this variation does not ultimately have a phenotypic effect.

### 306 **Variation and evolution of the eye patterning gene network**

307 There has been evolution in the regulatory logic of *hairy* and its upstream regulators *Delta* and *hedgehog*  
308 between species (Fig 4A-C, Table 2,  $p = .03$ ). There is also variation between sexes in the regulatory logic of  
309 *hairy* and its upstream regulators *Delta* and *hedgehog* (Table 2,  $p = .03$ ). There has been significant evolution of  
310 the regulatory logic of *atonal*, in a significant interaction between species and sex ( $p = 1 \times 10^{-3}$ ). Furthermore,  
311 while there was no significant effect of genotype for *hairy*, there is for *atonal*, indicating that there is variation  
312 segregating in the population affecting the relationship between *atonal*, *hedgehog*, and *Delta* ( $p = 1.6 \times 10^{-5}$ ).  
313 There is also a significant interaction between genotype and sex ( $p = 1 \times 10^{-3}$ ). Thus, the relationship between  
314 *hairy* and *atonal* and their regulators has evolved between species and sexes in *hairy*, and between genotypes  
315 and sex in *atonal*. We illustrate this difference between species in Figure 3, where a different relationship  
316 between *hairy* and *hedgehog* is visible between *D. melanogaster* and *D. simulans*. In brief, the frequency of cells  
317 with a given log transformed level of expression are plotted against one another for *hairy* and *hedgehog*. *hairy* is  
318 primarily expressed anterior to the MF and *hedgehog* posterior, and they have a different regulatory relationship  
319 in each region with *hedgehog* activating *hairy* long range (anterior) and repressing it short range (posterior). This  
320 is reflected in the frequency of cells expressing both genes for *D. melanogaster*, where anterior to the MF there  
321 is a high frequency of *hairy* expressing cells and a low frequency of co-occurring high *hedgehog* expression.  
322 Posterior to the MF the opposite is true, with high expression of *hedgehog* lacking concordance with any  
323 expression of *hairy*. In *D. simulans*, posterior to the MF, this relationship is the same as in *D. melanogaster*.  
324 However, in anterior to the MF this is not the case. Expression of *hairy* and *hedgehog* both increase as the other  
325 increases, with widespread co-occurrence.

**Table 2: The results of the full model for regulatory relationship between *hairy*, *Delta*, and *hedgehog*, and *atonal*, *Delta*, and *hedgehog*.**

***hairy***

| Effect         | numDF | denDF | F-value | p-value      |
|----------------|-------|-------|---------|--------------|
| Species        | 2     | 41    | 4.03    | <b>0.25</b>  |
| Genotype       | 8     | 84    | 1.2     | 0.31         |
| Sex            | 2     | 41    | 3.95    | <b>0.027</b> |
| Species x Sex  | 2     | 41    | 0.78    | 0.46         |
| Genotype x Sex | 8     | 84    | 1.11    | 0.37         |

***atonal***

| Effect         | numDF | denDF | F-value | p-value                      |
|----------------|-------|-------|---------|------------------------------|
| Species        | 2     | 41    | 2.64    | 0.08                         |
| Genotype       | 8     | 84    | 5.43    | <b>1.6 x 10<sup>-5</sup></b> |
| Sex            | 2     | 41    | 0.67    | 0.52                         |
| Species x Sex  | 2     | 41    | 8.09    | <b>1 x 10<sup>-3</sup></b>   |
| Genotype x Sex | 8     | 84    | 2.41    | <b>0.02</b>                  |

Significant *p*-values are indicated in bold, with gray shading.

326

327 **Variation and evolution of MF structure**

328 The amount that the eye discs were shifted is not significant for genotype, sex, or species, suggesting that  
329 the relationship of maximum gene expression with the MF does not vary. However, the amount that they were  
330 scaled is, after accounting for original differences in size, between species ( $p = 1.38 \times 10^{-6}$ ). This suggests that  
331 the total relative width of the MF varies between species, but not between genotypes or sexes. This is also  
332 suggestive of evolving interrelationships among genes that could result in broader or narrower areas in which  
333 they enhance or suppress expression of one another.

334 **Discussion**

335 Our results summarize a complicated pattern of variation sorting in the gene network involved in patterning the  
336 MF. For example, the overall shape of the expression of *hedgehog* across the eye disc is different between  
337 genotypes, sexes, and there is an interaction between species and sex and genotype and sex. *hedgehog*  
338 upregulates *hairy*, but *hairy* has differences in expression between species (which *hedgehog* does not),  
339 genotypes, and there is an interaction between genotype and sex. Thus, the differences seen in upstream  
340 regulators, such as *hedgehog*, are not recapitulated in their downstream targets. In another example, *Delta/Notch*  
341 is expected to repress *atonal*, but while *Delta/Notch* is significant for all categories tested *atonal* is only

342 significant for genotype, sex, and their interaction. It is possible that this variation is being mitigated or  
343 dampened by other regulatory factors not assayed here, or that certain aspects of genetic background are more or  
344 less sensitive to variation. For example, that fixed variation between species dampens variation at *Delta/Notch*  
345 but sorting variation remains sensitive between genotypes, which propagates to *atonal*.

346 It may be that all of this variation is within levels tolerated by the network, as it has been shown that gene  
347 networks can have thresholds of variation, below which differences in expression are effectively neutral. These  
348 thresholds can also be two sided, creating a sigmoidal curve the center of which is neutral phenotypic space  
349 (Felix and Barkoulas, 2015). Many studies have shown a relative insensitivity to variation in gene dosage, for  
350 example in *Drosophila* early embryos the *bicoid* gradient results in normal development at one to four dosages  
351 of the gene, but markedly abnormal development at six or more (Liu et al., 2013; Lucas et al., 2013; Namba et  
352 al., 1997). It is also possible that the ‘genetic stochasticity’ documented in these genes is in fact deleterious, and  
353 is being compensated for elsewhere in the network. While most deleterious mutations are purged by selection,  
354 they may rise in frequency due to genetic drift or hitchhiking, among other possible causes (Burch and Chao,  
355 1999; Chun and Fay, 2011; Estes and Lynch, 2003; McKenzie and Clarke, 1988). This type of compensatory  
356 mutation has been documented in microbial and animal systems (K. M. Brown et al., 2010; Burch and Chao,  
357 1999; Charusanti et al., 2010; Estes and Lynch, 2003; Estes et al., 2011; Maisnier-Patin and Andersson, 2004;  
358 McKenzie, 1993; McKenzie et al., 1982; Moore et al., 2000; Stoebel et al., 2009; Szamecz et al., 2014).  
359 Recently cell cycle heterogeneity has been implicated in the appearance of widespread noise in development,  
360 however this is not responsible for the genetic stochasticity observed here as all MF cells are arrested at G1  
361 (Keren et al., 2015; Kumar, 2013).

362 There have been other semi-quantitative approaches to studying spatial gene expression patterns. In another  
363 study on *orthodenticle*, the authors found that the spatial and temporal pattern of gene expression was conserved  
364 but the amount of gene product was not, though this work was not strictly quantitative given that measurements  
365 were from *in situ* hybridization and reporter constructs and there was no rigorous statistical testing (Goering et  
366 al., 2009). This is in contrast to our results which showed significant differences in the spatial relationship  
367 between gene expression patterns between species. Other semi-quantitative works on the *Drosophila* embryo  
368 using *in situ* hybridization found that the regulatory relationship between genes in the anterior-posterior



369 blastoderm patterning network were conserved, despite differences between species in their spatio-temporal  
370 pattern (Fowlkes et al., 2011; Wunderlich et al., 2012). Here we find that the regulatory relationship between  
371 *atonal* and *hairy*, and their regulators *hedgehog* and *Delta*, has evolved between species, sexes, and genotypes.

372 One of the important messages from this work is that rigorous statistical testing can uncover molecular  
373 variation in spatial and quantitative developmental gene expression. Using the type of replication applied in  
374 quantitative genetics with developmental data we were able to apply rigorous statistical models to micro-  
375 evolutionary variation in development. Despite this variation, observed with repeatable observations of  
376 developmental patterns among natural genotypes, the phenotypes of all flies are normal. This points to a  
377 potential abundance of hidden noise in spatial and quantitative gene expression. The evolutionary approach to  
378 development generally targets large changes that have occurred over broad phylogenetic distances (Ito et al.,  
379 2013; Jeong et al., 2008; Kopp et al., 2000; Reed et al., 2011; Rosenblum et al., 2010; Signor et al., 2016; Yassin  
380 et al., n.d.). Accordingly, the presence of abundant underlying variation is perhaps not a huge surprise. But it  
381 does have large implications, as it demands that we modify developmental models in such a way that such  
382 abundant genetic variation is buffered from perturbing the final phenotype. In the future, application of this type  
383 of replicated, quantitative, spatially resolved data will have unique insights into the penetrance of disease  
384 phenotypes and the origin of developmental defects.

385

#### 386 **Data Availability Statement**

387 All data associated with the manuscript can be found at:

388

#### 389 **Author contributions**

390 S. A. performed the staining and imaging of the eye discs, K. K. processed the imaging data, S.S. conceived of  
391 the experiment, analyzed the processed data and wrote the paper, S. N. conceived of the experiment and  
392 coordinated the research.

393

#### 394 **Acknowledgements**



395 The authors thank S. Restrepo, M. Samsonova, A. Kopp, P. Marjoram, J. Butler, G. Mackerel, R. Hudson, E.  
396 Williams, A. Lana, S. G. Frusina, H. Cagni and R. Hess for help with experimental procedures and manuscript  
397 preparation. This work was supported by grants U01GM103804 and RO1GM102227 to S.V.

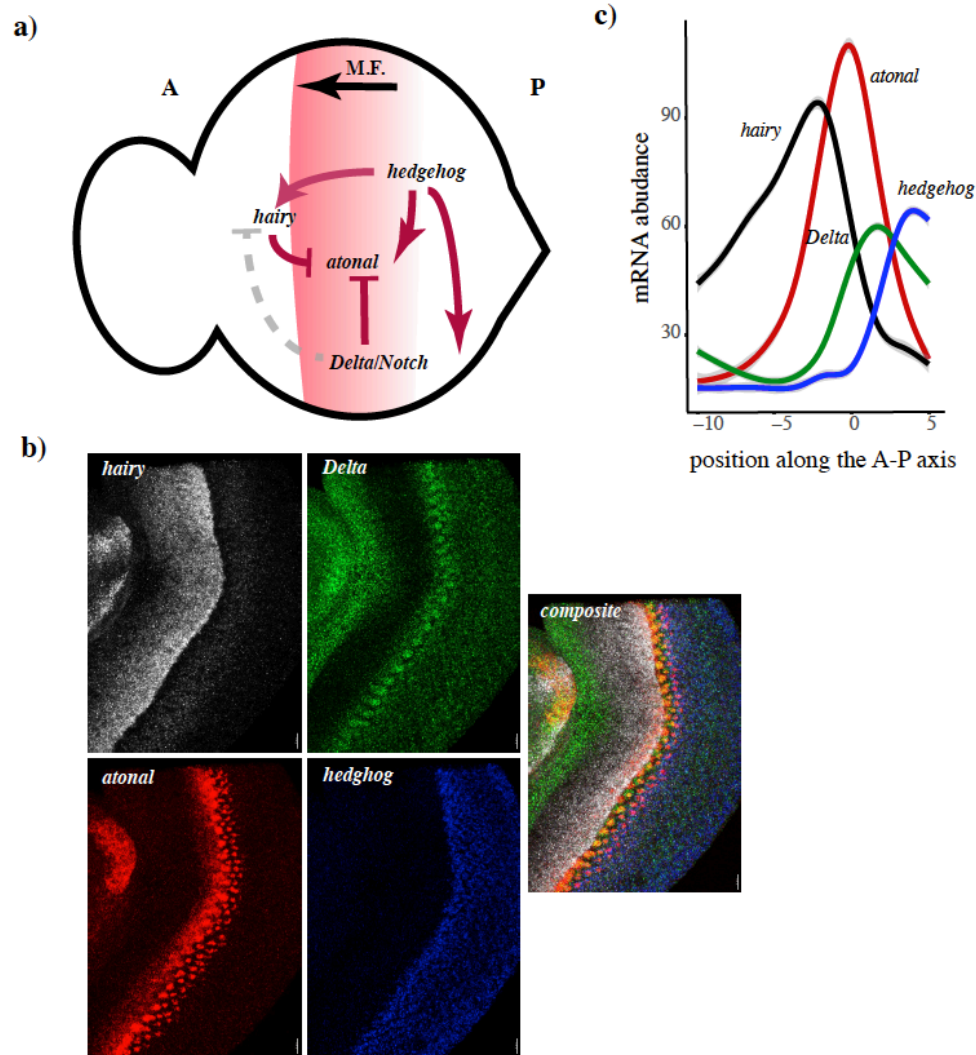

398

399

400 Figure 1. **a)** A summary of the eye patterning genes and pathway explored in this paper. The position of the MF  
401 is shown in red, and its direction of movement indicated below. Regulatory relationships are illustrated either as  
402 repression (bar) or activation (arrow). Regulatory relationships which are unclear are shown as gray dotted lines.  
403 **b)** Example images from the dataset, illustrating gene expression patterns of each gene. The composite image  
404 makes the additional point that we were able to analyze co-expression patterns of all four genes without needing  
405 to stain each gene in different samples and infer gene co-expression patterns. **c)** An illustration of the general

406 expression pattern of each of the four genes in the study, along the anterior-posterior axis of the eye disc. The  
 407 authors note that all curves shown in figures were plotted using `smooth.spline` in `ggplot2` in R, and are meant  
 408 only as visual representations of the data rather than formal reflection of the analysis.  
 409

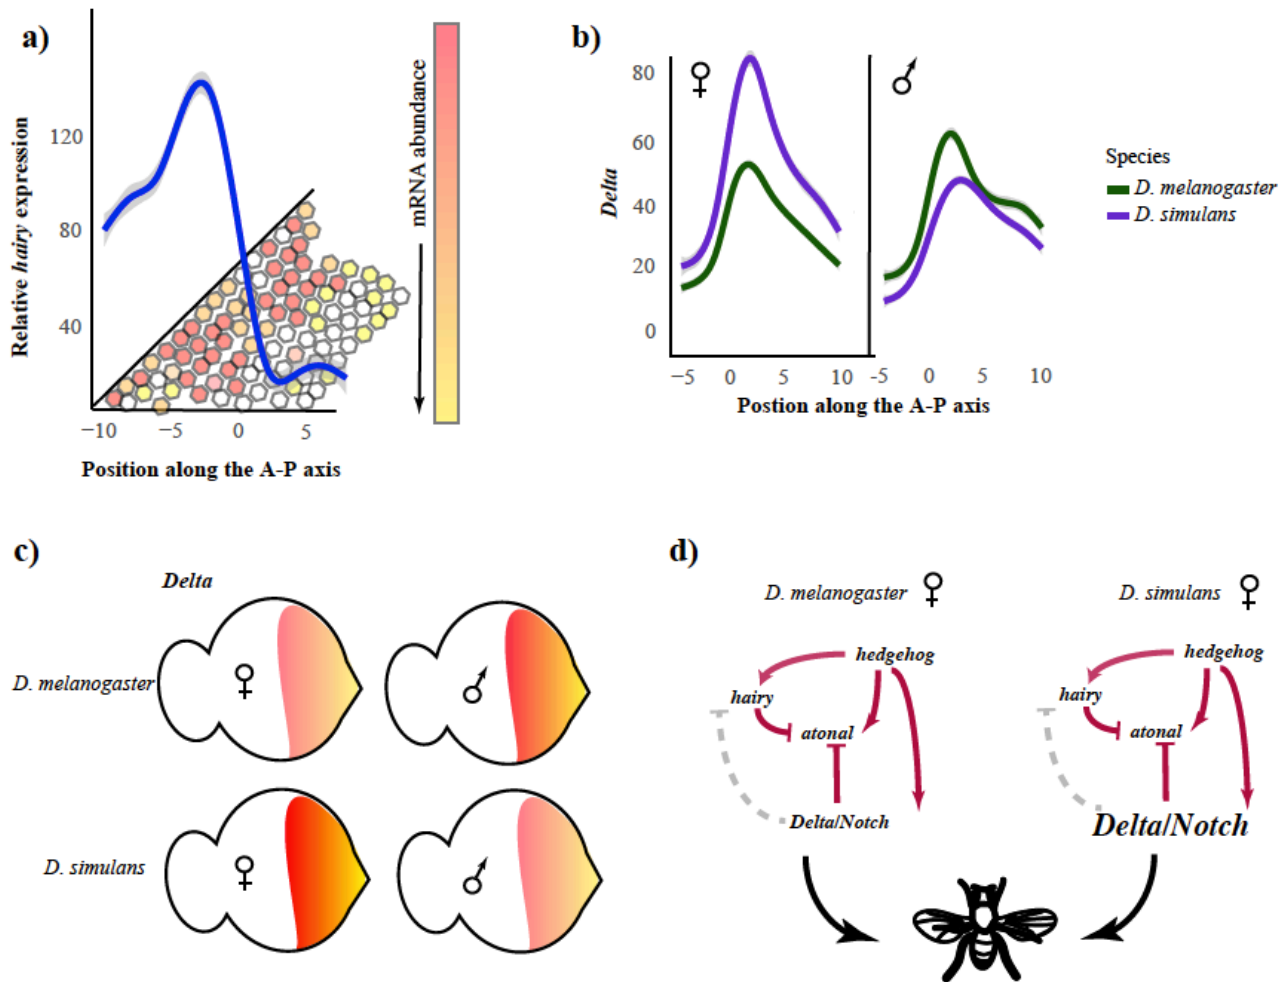

410  
 411 Figure 2. **a)** This is an example of a curve being fitted to the gene expression profiles, though note that the curve  
 412 corresponds to the average in a given row ( $x$ -axis). The hexagons are intended to represent cells with varying  
 413 amounts of *hairy* expression, from the highest (red) to the lowest (white). **b)** An illustration of variation in *Delta*  
 414 expression between species and sexes. Curves shown are fitted to all genotypes within a sex and species with  
 415 confidence intervals indicated in gray. **c)** An illustration using the imaginal disc of how *Delta* expression varied  
 416 between species and sexes, with lower expression in *D. melanogaster* females and *D. simulans* males **d)**  
 417 Evolution of *Delta* illustrated within the context of the gene network, illustrating how changes in *Delta*

418 expression are not perturbing the gene network and result in phenotypically normal *Drosophila*.

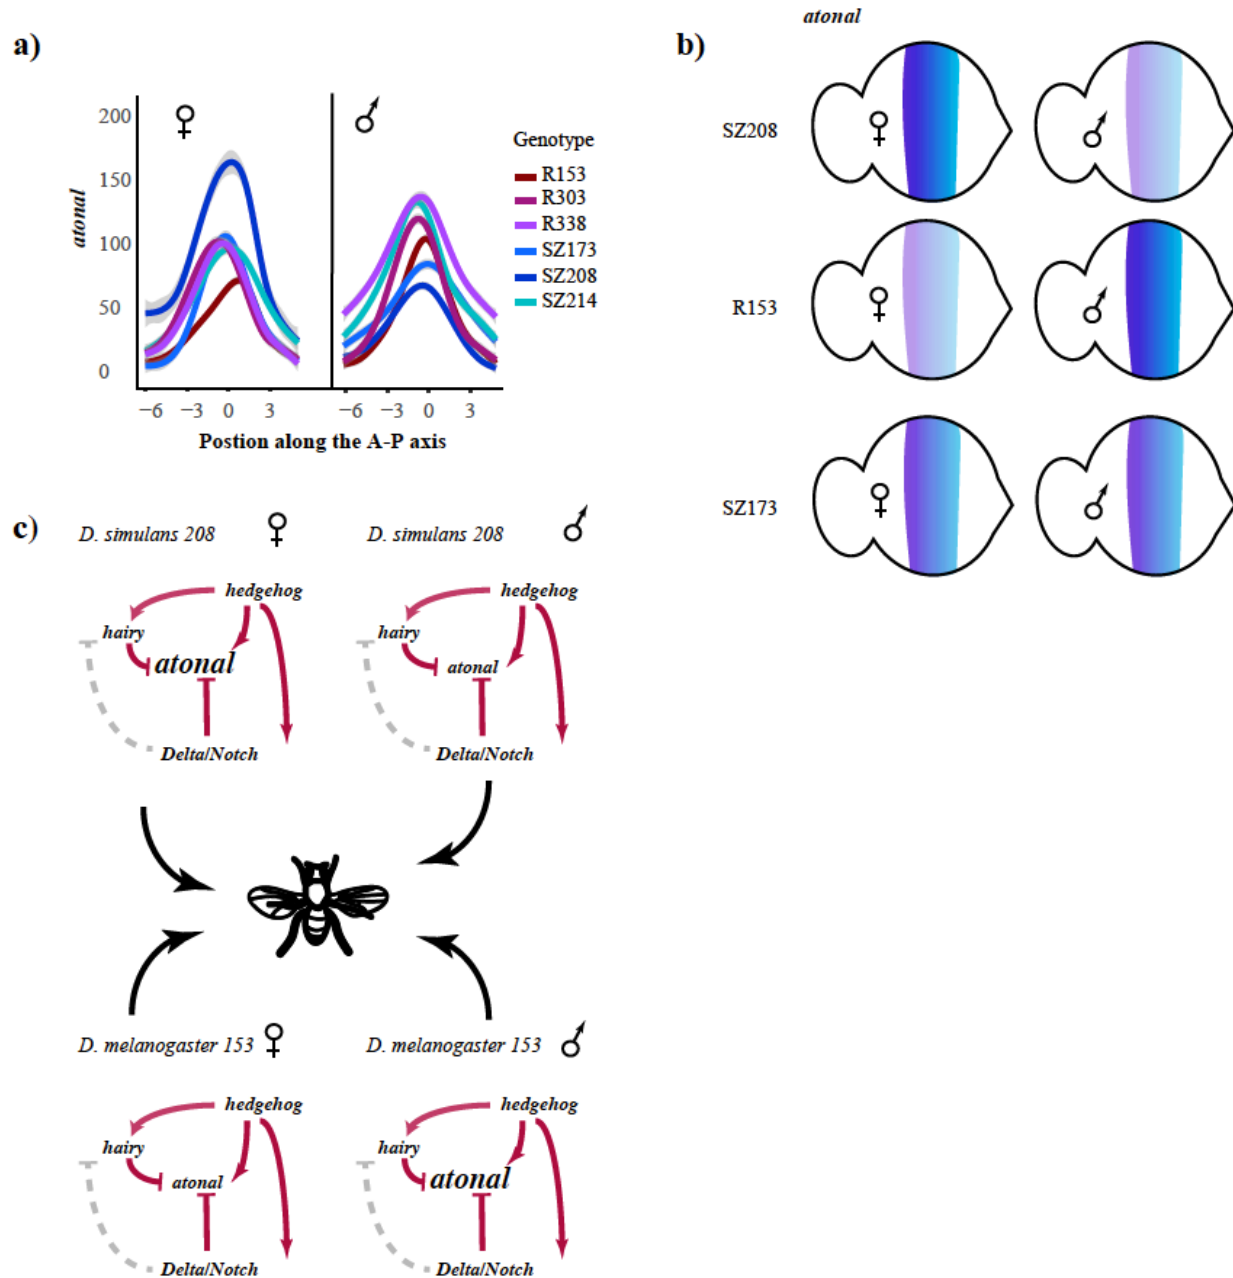

419

420 Figure 3. **a)** An illustration of variation in *atonal* expression between genotypes and sexes. Curves shown are  
 421 fitted to each genotype and sex with confidence intervals indicated in gray. **b)** An illustration using the imaginal  
 422 disc of how *atonal* expression varied between genotypes, with lower expression in females of *D. melanogaster*  
 423 R153 and males of *D. simulans* Sz208. *D. simulans* Sz173 has lower expression than females of Sz208 but it is  
 424 not sexually dimorphic. **c)** Evolution of *atonal* illustrated within the context of the gene network, illustrating

425 how changes in *atonal* expression are not perturbing the gene network and result in phenotypically normal  
426 *Drosophila*.

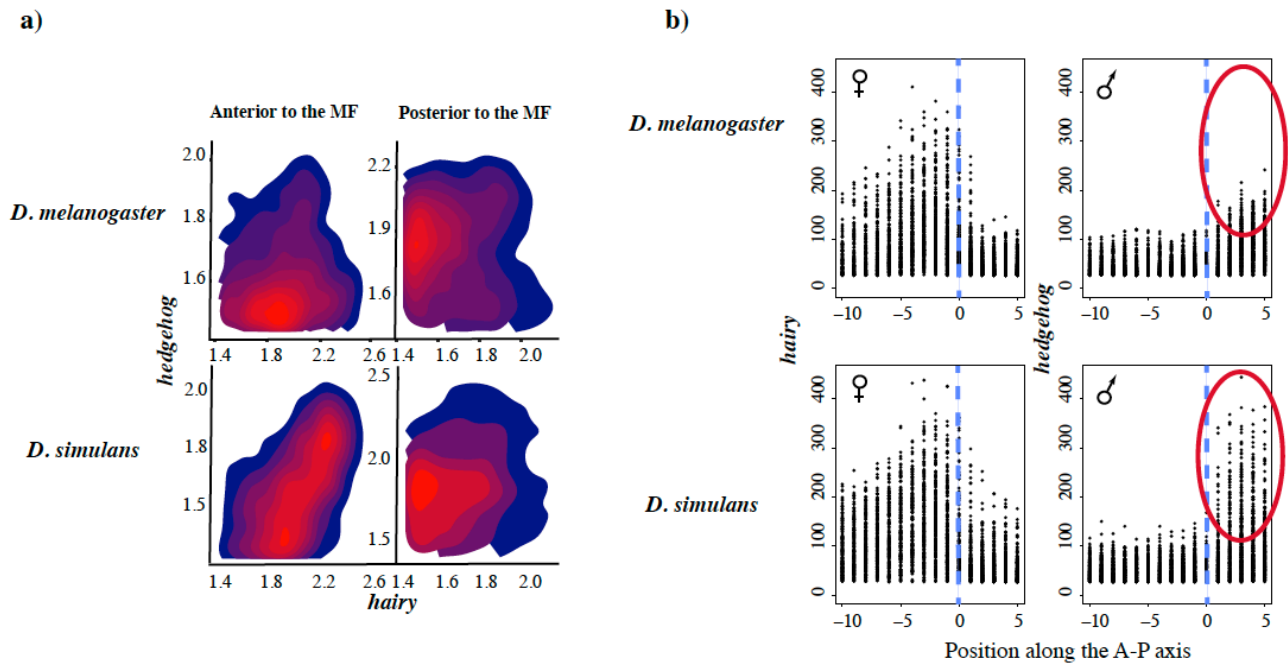

427

428

429 Figure 4. a) An example of variation in regulatory logic between *D. simulans* and *D. melanogaster* for *hairy* and  
430 *hedgehog*. The heat map illustrates the density of points, and thus reflects the frequency of a given co-expression  
431 profile between *hairy* and *hedgehog*. Gene expression values were log-transformed to better illustrate lower  
432 values and split between anterior to the MF and posterior to the MF. The split between the two regions was to  
433 investigate the possibility that *hedgehog* had a different regulatory relationship with *hairy* depending upon its  
434 relationship to the MF, given that *hedgehog* is thought to activate *hairy* long range and repress *hairy* short range.  
435 b) An illustration of the change in quantitative spatial expression of *hairy* and *hedgehog* between species and  
436 sexes, with the position of the center of the MF marked with a dotted blue line. The red circle emphasizes a large  
437 change in maximum *hedgehog* expression in males of the two species.

438

439

440

- 441 Atkins, M., Jiang, Y., Sansores-Garcia, L., Jusiak, B., Halder, G., Mardon, G., 2013. Dynamic rewiring of the  
442 *Drosophila* retinal determination network switches its function from selector to differentiation. PLoS Genet.  
443 9, e1003731.
- 444 Baker, N.E., Yu, S.Y., 2001. The EGF receptor defines domains of cell cycle progression and survival to  
445 regulate cell number in the developing *Drosophila* eye. Cell 104, 699–708.
- 446 Baker, N.E., Yu, S.Y., 1997. Proneural function of neurogenic genes in the developing *Drosophila* eye. Curr.  
447 Biol. 7, 122–132.
- 448 Bhattacharya, A., Baker, N.E., 2012. The role of the bHLH protein *hairy* in morphogenetic furrow progression  
449 in the developing *Drosophila* eye. PLoS ONE 7, e47503.
- 450 Bhattacharya, A., Baker, N.E., 2009. The HLH protein *Extramacrochaetae* is required for R7 cell and cone cell  
451 fates in the *Drosophila* eye. Dev. Biol.
- 452 Bothma, J.P., Garcia, H.G., Esposito, E., Schlissel, G., Gregor, T., Levine, M., 2014. Dynamic regulation of eve  
453 stripe 2 expression reveals transcriptional bursts in living *Drosophila* embryos. Proc. Nat. Acad. Sci. USA  
454 111, 10598–10603.
- 455 Brennan, C.A., Ashburner, M., Moses, K., 1998. Ecdysone pathway is required for furrow progression in the  
456 developing *Drosophila* eye. Development 125, 2653–2664.
- 457 Brown, K.M., Costanzo, M.S., Xu, W., Roy, S., Lozovsky, E.R., Hartl, D.L., 2010. Compensatory mutations  
458 restore fitness during the evolution of Dihydrofolate reductase. Mol. Biol. Evol. 27, 2682–2690.
- 459 Brown, N.L., Sattler, C.A., Markey, D.R., Carroll, S.B., 1991. *hairy* gene function in the *Drosophila* eye: normal  
460 expression is dispensable but ectopic expression alters cell fates. Development 113, 1245–1256.
- 461 Brown, N.L., Sattler, C.A., Paddock, S.W., Carroll, S.B., 1995. *Hairy* and *emc* negatively regulate  
462 morphogenetic furrow progression in the *Drosophila* eye. Cell 80, 879–887.
- 463 Burch, C.L., Chao, L., 1999. Evolution by small steps and rugged landscapes in the RNA virus phi6. Genetics  
464 151, 921–927.
- 465 Charusanti, P., Conrad, T.M., Knight, E.M., Venkataraman, K., Fong, N.L., Xie, B., Gao, Y., Palsson, B.Ø.,  
466 2010. Genetic basis of growth adaptation of *Escherichia coli* after deletion of *pgi*, a major metabolic gene.  
467 PLoS Genet. 6, e1001186.
- 468 Choi, H.M.T., Beck, V.A., Pierce, N.A., 2014. Next-generation *in situ* hybridization chain reaction: higher gain,  
469 lower cost, greater durability. ACS Nano 8, 4284–4294.
- 470 Chun, S., Fay, J.C., 2011. Evidence for hitchhiking of deleterious mutations within the human genome. PLoS  
471 Genet. 7, e1002240.
- 472 Cook, T., Pichaud, F., Sonnevill, R., Papatsenko, D., Desplan, C., 2003. Distinction between color  
473 photoreceptor cell fates is controlled by *Prospero* in *Drosophila*. Dev. Cell 4, 853–864.
- 474 Dominguez, M., Hafen, E., 1997. *Hedgehog* directly controls initiation and propagation of retinal differentiation  
475 in the *Drosophila* eye. Genes Dev. 11, 3254–3264.
- 476 Dominguez, M., Wasserman, J.D., Freeman, M., 1998. Multiple functions of the EGF receptor in *Drosophila*  
477 eye development. Curr. Biol. 8, 1039–1048.
- 478 Escudero, L.M., Freeman, M., 2007. Mechanism of G1 arrest in the *Drosophila* eye imaginal disc. BMC Dev.  
479 Biol. 7, 13.
- 480 Estes, S., Lynch, M., 2003. Rapid fitness recovery in mutationally degraded lines of *Caenorhabditis elegans*.  
481 Evolution 57, 1022–1030.
- 482 Estes, S., Phillips, P.C., Denver, D.R., 2011. Fitness recovery and compensatory evolution in natural mutant  
483 lines of *C. elegans*. Evolution 65, 2335–2344.
- 484 Felix, M.-A., Barkoulas, M., 2015. Pervasive robustness in biological systems. Nat. Rev. Genet. 16, 483–496.  
485 doi:10.1038/nrg3949
- 486 Felsenfeld, A.L., Kennison, J.A., 1995. Positional signaling by *hedgehog* in *Drosophila* imaginal disc  
487 development. Development 121, 1–10.
- 488 Firth, L.C., Baker, N.E., 2005. Extracellular signals responsible for spatially regulated proliferation in the  
489 differentiating *Drosophila* eye. Dev. Cell 8, 541–551.
- 490 Firth, L.C., Bhattacharya, A., Baker, N.E., 2010. Cell cycle arrest by a gradient of *Dpp* signaling during  
491 *Drosophila* eye development. BMC Dev. Biol. 10, 28.
- 492 Fowlkes, C.C., Eckenrode, K.B., Bragdon, M.D., Meyer, M., Wunderlich, Z., Simirenko, L., Luengo Hendriks,  
493 C.L., Keranen, S.V.E., Henriquez, C., Knowles, D.W., Biggin, M.D., Eisen, M.B., DePace, A.H., 2011. A



- 494 Conserved developmental patterning network produces quantitatively different output in multiple species of  
495 *Drosophila*. PLoS Genet. 7, e1002346.
- 496 Freeman, A.B.A.M., 2001. *Notch* signalling and the initiation of neural development in the *Drosophila* eye.  
497 Development 128, 3889-3898.
- 498 Fukaya, T., Lim, B., Levine, M., 2016. Enhancer control of transcriptional bursting. Cell 166, 358–368.
- 499 Gavish, A., Shwartz, A., Weizman, A., Schejter, E., Shilo, B.-Z., Barkai, N., 2016. Periodic patterning of the  
500 *Drosophila* eye is stabilized by the diffusible activator *Scabrous*. Nat. Comm. 7, 1–10.
- 501 Goering, L.M., Hunt, P.K., Heighington, C., Busick, C., Pennings, P., Hermisson, J., Kumar, S., Gibson, G.,  
502 2009. Association of *orthodenticle* with natural variation for early embryonic patterning in *Drosophila*  
503 *melanogaster*. J. Exp. Zool. 312B, 841–854.
- 504 Heberlein, U., Wolff, T., Rubin, G.M., 1993. The TGF[ $\beta$ ] homolog *dpp* and the segment polarity gene  
505 *hedgehog* are required for propagation of a morphogenetic wave in the *Drosophila* retina. Cell 75, 913–926.
- 506 Ito, Y., Harigai, A., Nakata, M., Hosoya, T., Araya, K., Oba, Y., Ito, A., Ohde, T., Yaginuma, T., Niimi, T.,  
507 2013. The role of *doublesex* in the evolution of exaggerated horns in the Japanese rhinoceros beetle. Nat.  
508 Neurosci. 14, 561–567.
- 509 Jarman, A.P., Grell, E.H., Ackerman, L., Jan, L.Y., Jan, Y.N., 1994. *atonal* is the proneural gene for *Drosophila*  
510 photoreceptors. Nature 369, 398–400.
- 511 Jeong, S., Rebeiz, M., Andolfatto, P., Werner, T., True, J., Carroll, S.B., 2008. The evolution of gene regulation  
512 underlies a morphological difference between two *Drosophila* sister species. Cell 132, 783–793.
- 513 Johnston, R.J., Desplan, C., 2014. Interchromosomal communication coordinates intrinsically stochastic  
514 expression between alleles. Science 343, 661–665.
- 515 Johnston, R.J., Jr, Otake, Y., Sood, P., Vogt, N., Behnia, R., Vasiliauskas, D., McDonald, E., Xie, B., Koenig,  
516 S., Wolf, R., Cook, T., Gebelein, B., Kussell, E., Nakagoshi, H., Desplan, C., 2011. Interlocked feedforward  
517 loops control cell-type-specific rhodopsin expression in the *Drosophila* eye. Cell 145, 956–968.
- 518 Keren, L., van Dijk, D., Weingarten-Gabbay, S., Davidi, D., Jona, G., Weinberger, A., Milo, R., Segal, E., 2015.  
519 Noise in gene expression is coupled to growth rate. Genome Res. 25, 1893–1902.
- 520 Kopp, A., Duncan, I., Godt, D., Carroll, S.B., 2000. Genetic control and evolution of sexually dimorphic  
521 characters in *Drosophila*. Nature 408, 553–559.
- 522 Kozlov, K., Kosheverova, V., Kamentseva, R., Kharchenko, M., Sokolkova, A., Kornilova, E., Samsonova, M.,  
523 2017. Quantitative analysis of the heterogeneous population of endocytic vesicles. J. Bioinform. Comput.  
524 Biol. 10, 1750008.
- 525 Kumar, J.P., 2013. Catching the next wave: Patterning of the *Drosophila* eye by the morphogenetic furrow, in:  
526 molecular genetics of axial patterning, growth and disease in the *Drosophila* eye. in *Molecular Genetics of*  
527 *Axial Patterning*, Springer New York, New York, NY, pp. 75–97.
- 528 Li, W., Ohlmeyer, J.T., Lane, M.E., Kalderon, D., 1995. Function of protein kinase A in *hedgehog* signal  
529 transduction and *Drosophila* imaginal disc development. Cell 80, 553–562.
- 530 Li, Y., Baker, N.E., 2001. Proneural enhancement by *Notch* overcomes Suppressor-of-Hairless repressor  
531 function in the developing *Drosophila* eye. Curr. Biol. 11, 330–338.
- 532 Liu, F., Morrison, A.H., Gregor, T., 2013. Dynamic interpretation of maternal inputs by the *Drosophila*  
533 segmentation gene network. Proc. Nat. Acad. Sci. USA 110, 6724–6729.
- 534 Lucas, T., Ferraro, T., Roelens, B., Las Heras Chanes, De, J., Walczak, A.M., Coppey, M., Dostatni, N., 2013.  
535 Live imaging of *bicoid*-dependent transcription in *Drosophila* embryos. Curr. Biol. 23, 2135–2139.
- 536 Ma, C., Moses, K., 1995. *Wingless* and *patched* are negative regulators of the morphogenetic furrow and can  
537 affect tissue polarity in the developing *Drosophila* compound eye. Development 121, 2279–2289.
- 538 Ma, C., Zhou, Y., Beachy, P.A., Moses, K., 1993. The segment polarity gene *hedgehog* is required for  
539 progression of the morphogenetic furrow in the developing *Drosophila* eye. Cell 75, 927–938.
- 540 Mackay, T.F.C., Richards, S., Stone, E.A., Barbadilla, A., Ayroles, J.F., Zhu, D., Casillas, S., Han, Y., Magwire,  
541 M.M., Cridland, J.M., Richardson, M.F., Anholt, R.R.H., Barrón, M., Bess, C., Blankenburg, K.P., Carbone,  
542 M.A., Castellano, D., Chaboub, L., Duncan, L., Harris, Z., Javaid, M., Jayaseelan, J.C., Jhangiani, S.N.,  
543 Jordan, K.W., Lara, F., Lawrence, F., Lee, S.L., Librado, P., Linheiro, R.S., Lyman, R.F., Mackey, A.J.,  
544 Munidasa, M., Muzny, D.M., Nazareth, L., Newsham, I., Perales, L., Pu, L.-L., Qu, C., Ràmia, M., Reid,  
545 J.G., Rollmann, S.M., Rozas, J., Saada, N., Turlapati, L., Worley, K.C., Wu, Y.-Q., Yamamoto, A., Zhu, Y.,

- 546 Bergman, C.M., Thornton, K.R., Mittelman, D., Gibbs, R.A., 2012. The *Drosophila melanogaster* Genetic  
547 Reference Panel. *Nature* 482, 173–178. d
- 548 Maisnier-Patin, S., Andersson, D.I., 2004. Adaptation to the deleterious effects of antimicrobial drug resistance  
549 mutations by compensatory evolution. *R. Microbiol.* 155, 360–369.
- 550 McKenzie, J.A., 1993. Measuring fitness and intergenic interactions: The evolution of resistance to diazinon in  
551 *Lucilia cuprina*. *Genetica* 90, 227–237.
- 552 McKenzie, J.A., Clarke, G.M., 1988. Diazinon resistance, fluctuating asymmetry and fitness in the Australian  
553 sheep blowfly, *Lucilia cuprina*. *Genetics* 120, 213–220.
- 554 McKenzie, J.A., Whitten, M.J., Adena, M.A., 1982. The effect of genetic background on the fitness of diazinon  
555 resistance genotypes of the Australian sheep blowfly, *Lucilia cuprina*. *Heredity* 49, 1–9.
- 556 Meyer, F., 1994. Topographic distance and watershed lines. *Signal processing* 38, 113–125.
- 557 Moore, F.B., Rozen, D.E., Lenski, R.E., 2000. Pervasive compensatory adaptation in *Escherichia coli*. *Proc. R.*  
558 *Soc. B* 267, 515–522.
- 559 Namba, R., Pazdera, T.M., Cerrone, R.L., Minden, J.S., 1997. *Drosophila* embryonic pattern repair: how  
560 embryos respond to *bicoid* dosage alteration. *Development* 124, 1393–1403.
- 561 Paaby, A., Gibson, G., 2016. Cryptic genetic variation in evolutionary developmental genetics. *Biology* 5, 28–  
562 13.
- 563 Pan, D., Rubin, G.M., 1995. cAMP-dependent protein kinase and *hedgehog* act antagonistically in regulating  
564 decapentaplegic transcription in *Drosophila* imaginal discs. *Cell* 80, 543–552.
- 565 Raj, A., van den Bogaard, P., Rifkin, S.A., van Oudenaarden, A., Tyagi, S., 2008. Imaging individual mRNA  
566 molecules using multiple singly labeled probes. *Nat. Meth.* 5, 877–879.
- 567 Reed, R.D., Papa, R., Martin, A., Hines, H.M., Counterman, B.A., Pardo-Diaz, C., Jiggins, C.D., Chamberlain,  
568 N.L., Kronforst, M.R., Chen, R., Halder, G., Nijhout, H.F., McMillan, W.O., 2011. *optix* drives the repeated  
569 convergent evolution of butterfly wing pattern mimicry. *Science* 333, 1137–1141.
- 570 Roignant, J.-Y., Treisman, J.E., 2009. Pattern formation in the *Drosophila* eye disc. *Int. J. Dev. Biol.* 53, 795–  
571 808.
- 572 Rosenblum, E.B., Römler, H., Schöneberg, T., Hoekstra, H.E., 2010. Molecular and functional basis of  
573 phenotypic convergence in white lizards at White Sands. *Proc. Nat. Acad. Sci. USA* 107, 2113–2117.
- 574 Shah, S., Lubeck, E., Schwarzkopf, M., He, T.F., 2016. Single-molecule RNA detection at depth via  
575 hybridization chain reaction and tissue hydrogel embedding and clearing. *Development*. 143, 2862–2867.
- 576 Signor, S.A., Liu, Y., Rebeiz, M., Kopp, A., 2016. Genetic convergence in the evolution of male-specific color  
577 patterns in *Drosophila*. *Curr. Biol.* 26, 2423–2433.
- 578 Signor, S.A., New, F.N., Nuzhdin, S., 2017. A Large panel of *Drosophila simulans* reveals an abundance of  
579 common variants. *Genome Biol. Evol.* 10, 189–206.
- 580 Spencer, S.A., Powell, P.A., Miller, D.T., Cagan, R.L., 1998. Regulation of EGF receptor signaling establishes  
581 pattern across the developing *Drosophila* retina. *Development* 125, 4777–4790.
- 582 Stoebel, D.M., Hokamp, K., Last, M.S., Dorman, C.J., 2009. Compensatory evolution of gene regulation in  
583 response to stress by *Escherichia coli* lacking RpoS. *PLoS Genet.* 5, e1000671.
- 584 Greenwood, S., and Struhl, G., 1999. Progression of the morphogenetic furrow in the *Drosophila* eye: the roles  
585 of *hedgehog*, *Decapentaplegic* and the Raf pathway. *Development*. 126, 5795–5808.
- 586 Strutt, D.I., Mlodzik, M., 1997. *Hedgehog* is an indirect regulator of morphogenetic furrow progression in the  
587 *Drosophila* eye disc. *Development* 124, 3233–3240.
- 588 Sun, Y., Jan, L.Y., Jan, Y.N., 1998. Transcriptional regulation of *atonal* during development of the *Drosophila*  
589 peripheral nervous system. *Development* 125, 3731–3740.
- 590 Szamecz, B., Boross, G., Kalapis, D., Kovács, K., Fekete, G., Farkas, Z., Lázár, V., Hrtyan, M., Kemmeren, P.,  
591 Groot Koerkamp, M.J.A., Rutkai, E., Holstege, F.C.P., Papp, B., Pál, C., 2014. The genomic landscape of  
592 compensatory evolution. *PLoS Biol.* 12, e1001935.
- 593 Tantale, K., Kozulic-Pirher, A., Lesne, A., Victor, J.-M., Robert, M.-C.E.C., Capozzi, S., Chouaib, R., cker,  
594 V.B.A., Mateos-Langerak, J., Darzacq, X., Zimmer, C., Mueller, F., Basyuk, E., Bertrand, E., 2016. A  
595 single-molecule view of transcription reveals convoys of RNA polymerases and multi-scale bursting. *Nat.*  
596 *Comm.* 7, 1–14.
- 597 Tsachaki, M., Sprecher, S.G., 2011. Genetic and developmental mechanisms underlying the formation of the  
*Drosophila* compound eye. *Dev. Dyn.* 241, 40–56.

- 598 Vincent, L., 1993. Morphological grayscale reconstruction in image analysis: Applications and efficient  
599 algorithms. *IEEE transactions on image processing* 2, 176–201.
- 600 Wernet, M.F., Mazzoni, E.O., Çelik, A., Duncan, D.M., Duncan, I., Desplan, C., 2006. Stochastic spineless  
601 expression creates the retinal mosaic for colour vision. *Nature* 440, 174–180.
- 602 Wunderlich, Z., Bragdon, M.D., Eckenrode, K.B., Lydiard-Martin, T., Pearl-Waserman, S., DePace, A.H., 2012.  
603 Dissecting sources of quantitative gene expression pattern divergence between *Drosophila* species. *Mol.*  
604 *Syst. Biol.* 8, 1–15.
- 605 Yassin, A., Delaney, E.K., Reddieux, A., Bastide, H., Seher, T., Appleton, N.C., Lack, J.B., David, J.R.,  
606 Chenoweth, S.F., Pool, J.E., Kopp, A., 2017. *pdm3* is responsible for recurrent evolution of female-limited  
607 color dimorphism in *Drosophil*. *Curr. Biol.* 26, 2412-2422.
- 608
- 609

## 610 **Supporting Information**

- 611 **S1 Fig. Typical anterior-to-posterior expression patterns in the MF.** *hairy* (white), *atonal* (red), *Delta*  
612 (green), and *hedgehog* (blue), 3rd instar larva eye disc labeled using HCR. Please note that these images contain  
613 portions of the antennal disc, which were excluded from any analysis. Scale bars are 30  $\mu\text{m}$ .
- 614 **S1 File Protocol: Hybridization chain reaction *Drosophila* imaginal discs**
- 615 **S1 Table The sequence of each of the probes used for hybridization chain reaction.**
